# Supplementary material for: Comparison of six different soft computing methods in modeling evaporation in different climates
Source: Copernicus journal article supplement (doi:10.5194/hess-2016-247), 2016-05-23
Supplement: Supplementary file [file hess-2016-247-AC1-supplement.pdf]

Table 1. The geographical locations and associated annual climatic parameters

| Station | Longitude | Latitude | Altitude<br>(m) | Temperature<br>(°C) | Precipitation<br>(mm) |
|---------|-----------|----------|-----------------|---------------------|-----------------------|
| HEB     | 126 °46'E | 45 °45'N | 142.3           | 4.17                | 524.3                 |
| ALT     | 108 °05'E | 47 °44'N | 735.3           | 4.54                | 191.3                 |
| MQ      | 103 °05'E | 38 °38'N | 1367            | 8.33                | 113                   |
| BJ      | 116 °28'E | 39 °48'N | 31.3            | 12.20               | 571.9                 |
| LSA     | 91 °08'E  | 29 °40'N | 3648.7          | 7.82                | 426.4                 |
| CQ      | 106°28'E  | 29 °35'N | 259.1           | 18.04               | 1104.5                |
| HZ      | 120 °10'E | 30 °14'N | 41.7            | 16.45               | 1454.6                |
| HK      | 110 °21'E | 20 °02'N | 13.9            | 24.08               | 1651.9                |

Table 2.Monthly statistical parameters of each data set for each station

| Station    | Dataset          | $x_{\text{mean}}$ | $S_x$ | $C_v$ | $C_x$ | $x_{\text{min}}$ | $x_{\text{max}}$ | $R$   |
|------------|------------------|-------------------|-------|-------|-------|------------------|------------------|-------|
| <b>HEB</b> | <b><i>Rg</i></b> | 12.98             | 5.35  | 0.41  | 0.00  | 3.68             | 28.71            | 0.89  |
|            | <b><i>Ta</i></b> | 4.17              | 14.52 | 3.48  | -0.25 | -24.71           | 25.25            | 0.86  |
|            | <b><i>Hs</i></b> | 7.02              | 1.59  | 0.23  | -0.25 | 2.82             | 10.89            | 0.79  |
|            | <b><i>RH</i></b> | 65.44             | 11.01 | 0.17  | -0.44 | 36.23            | 85.06            | -0.36 |
|            | <b><i>Ws</i></b> | 3.69              | 0.97  | 0.26  | 0.61  | 1.88             | 6.69             | 0.26  |
|            | <b><i>EP</i></b> | 4.35              | 3.27  | 0.75  | 0.44  | 0.16             | 12.96            | 1     |
| <b>ALT</b> | <b><i>Rg</i></b> | 15.13             | 7.21  | 0.48  | -0.06 | 2.34             | 27.69            | 0.92  |
|            | <b><i>Ta</i></b> | 4.54              | 13.95 | 3.07  | -0.25 | -25.08           | 24.87            | 0.93  |
|            | <b><i>Hs</i></b> | 8.2               | 2.52  | 0.31  | -0.25 | 1.92             | 12.66            | 0.90  |
|            | <b><i>RH</i></b> | 57.99             | 13.41 | 0.23  | 0     | 30.1             | 86.77            | -0.89 |
|            | <b><i>Ws</i></b> | 2.40              | 0.99  | 0.41  | 0.05  | 0.31             | 5.46             | 0.69  |
|            | <b><i>EP</i></b> | 4.72              | 3.84  | 0.81  | 0.33  | 0.15             | 13.79            | 1     |
| <b>MQ</b>  | <b><i>Rg</i></b> | 16.41             | 4.98  | 0.30  | 0.07  | 7.21             | 26.9             | 0.92  |
|            | <b><i>Ta</i></b> | 8.33              | 11.32 | 1.36  | -0.19 | -15.46           | 25.72            | 0.93  |
|            | <b><i>Hs</i></b> | 8.37              | 1.12  | 0.13  | 0.30  | 5.47             | 11.38            | 0.72  |
|            | <b><i>RH</i></b> | 44.82             | 9.06  | 0.2   | 0.12  | 24.3             | 74.58            | -0.29 |
|            | <b><i>Ws</i></b> | 2.68              | 0.55  | 0.20  | 0.08  | 1.23             | 4.32             | 0.55  |
|            | <b><i>EP</i></b> | 7.26              | 4.45  | 0.61  | 0.10  | 0.42             | 15.89            | 1     |
| <b>BJ</b>  | <b><i>Rg</i></b> | 14.61             | 4.94  | 0.34  | 0.05  | 5.14             | 25.59            | 0.91  |
|            | <b><i>Ta</i></b> | 12.20             | 10.74 | 0.88  | -0.17 | -7.6             | 29.56            | 0.75  |
|            | <b><i>Hs</i></b> | 7.41              | 1.42  | 0.19  | 0.06  | 3.79             | 11.21            | 0.76  |
|            | <b><i>RH</i></b> | 57.29             | 13.70 | 0.24  | 0.02  | 21.86            | 85.52            | 0.09  |
|            | <b><i>Ws</i></b> | 2.50              | 0.67  | 0.27  | 0.49  | 1.07             | 4.65             | 0.14  |
|            | <b><i>EP</i></b> | 5.09              | 2.83  | 0.56  | 0.70  | 0.85             | 15.63            | 1     |
| <b>LSA</b> | <b><i>Rg</i></b> | 20.41             | 4.20  | 0.21  | 0.11  | 10.39            | 30.69            | 0.68  |
|            | <b><i>Ta</i></b> | 7.82              | 6.37  | 0.81  | -0.21 | -5.16            | 18.19            | 0.75  |
|            | <b><i>Hs</i></b> | 8.19              | 0.96  | 0.12  | -0.59 | 4.66             | 10.55            | 0.18  |
|            | <b><i>RH</i></b> | 44.39             | 15.10 | 0.34  | 0.30  | 15.36            | 76.61            | 0.19  |
|            | <b><i>Ws</i></b> | 1.90              | 0.46  | 0.24  | 0.30  | 0.92             | 3.41             | 0.34  |
|            | <b><i>EP</i></b> | 6.35              | 2.23  | 0.35  | 0.36  | 2.15             | 13.28            | 1     |
| <b>CQ</b>  | <b><i>Rg</i></b> | 8.80              | 4.69  | 0.53  | 0.43  | 0                | 21.32            | 0.92  |
|            | <b><i>Ta</i></b> | 17.93             | 7.46  | 0.42  | -0.10 | 0.64             | 30.90            | 0.85  |
|            | <b><i>Hs</i></b> | 2.83              | 2.02  | 0.71  | 0.91  | 0                | 9.19             | 0.94  |
|            | <b><i>RH</i></b> | 79.15             | 8.55  | 0.11  | -4.66 | 6.97             | 90.30            | -0.40 |
|            | <b><i>Ws</i></b> | 1.36              | 0.34  | 0.25  | -0.12 | 0.64             | 2.13             | 0.58  |
|            | <b><i>EP</i></b> | 2.86              | 1.94  | 0.68  | 0.87  | 0.54             | 9.32             | 1     |
| <b>HZ</b>  | <b><i>Rg</i></b> | 11.63             | 4.20  | 0.36  | 0.54  | 3.93             | 24.83            | 0.94  |
|            | <b><i>Ta</i></b> | 16.45             | 8.46  | 0.51  | -0.06 | -0.01            | 31.03            | 0.88  |
|            | <b><i>Hs</i></b> | 4.99              | 1.74  | 0.35  | 0.63  | 1.19             | 11.25            | 0.80  |
|            | <b><i>RH</i></b> | 78.04             | 5.63  | 0.07  | -0.80 | 53.74            | 90.42            | -0.04 |
|            | <b><i>Ws</i></b> | 2.24              | 0.43  | 0.19  | 0.05  | 1.01             | 3.58             | 0.13  |
|            | <b><i>EP</i></b> | 3.65              | 1.94  | 0.53  | 0.84  | 0.74             | 11.33            | 1     |
| <b>HK</b>  | <b><i>Rg</i></b> | 13.86             | 4.33  | 0.31  | -0.05 | 4.06             | 24.34            | 0.90  |

|                  |       |      |      |       |       |       |       |
|------------------|-------|------|------|-------|-------|-------|-------|
| <b><i>Ta</i></b> | 24.08 | 4.07 | 0.17 | -0.55 | 13.21 | 29.83 | 0.81  |
| <b><i>Hs</i></b> | 5.83  | 1.96 | 0.34 | -0.26 | 0.47  | 9.94  | 0.89  |
| <b><i>RH</i></b> | 84.14 | 3.61 | 0.04 | -0.52 | 71.39 | 94.46 | -0.41 |
| <b><i>Ws</i></b> | 2.65  | 0.66 | 0.25 | 0.61  | 1.33  | 4.98  | 0.04  |
| <b><i>Ep</i></b> | 5.00  | 1.59 | 0.32 | 0.08  | 1.37  | 9.97  | 1     |

The unit of *Rg*, *Ta*, *Pa*, *Ws* and *Ep* are MJ m<sup>-2</sup>, °C, hPa, ms<sup>-1</sup> and mm/day, respectively;  $x_{\text{mean}}$ ,  $S_x$ ,  $C_v$ ,  $C_x$ ,  $x_{\text{min}}$  and  $x_{\text{max}}$  denote the mean, standard deviation, variation coefficient, skewness, minimum and maximum values, respectively.

Table 3. The input combinations for different artificial intelligence techniques.

| Models           |            |              |               |              |             | Input combinations               |
|------------------|------------|--------------|---------------|--------------|-------------|----------------------------------|
| ANFIS-GP         | FG         | GRNN         | LSSVM         | MARS         | MLP         |                                  |
| ANFIS-GP1        | FG1        | GRNN1        | LSSVM1        | MARS1        | MLP1        | <b><i>Rg</i></b>                 |
| ANFIS-GP2        | FG2        | GRNN2        | LSSVM2        | MARS2        | MLP2        | <b><i>Ta</i></b>                 |
| ANFIS-GP3        | FG3        | GRNN3        | LSSVM3        | MARS3        | MLP3        | <b><i>Hs</i></b>                 |
| <b>ANFIS-GP4</b> | <b>FG4</b> | <b>GRNN4</b> | <b>LSSVM4</b> | <b>MARS4</b> | <b>MLP4</b> | <b><i>RH</i></b>                 |
| <b>ANFIS-GP5</b> | <b>FG5</b> | <b>GRNN5</b> | <b>LSSVM5</b> | <b>MARS5</b> | <b>MLP5</b> | <b><i>Ws</i></b>                 |
| ANFIS-GP6        | FG6        | GRNN6        | LSSVM6        | MARS6        | MLP6        | <b><i>Rg, Ta</i></b>             |
| ANFIS-GP7        | FG7        | GRNN7        | LSSVM7        | MARS7        | MLP7        | <b><i>Rg, Ta, Hs</i></b>         |
| ANFIS-GP8        | FG8        | GRNN8        | LSSVM8        | MARS8        | MLP8        | <b><i>Rg, Ta, Hs, RH</i></b>     |
| ANFIS-GP9        | FG9        | GRNN9        | LSSVM9        | MARS9        | MLP9        | <b><i>Rg, Ta, Hs, RH, Ws</i></b> |

Table 4. Comparisons of different models for predicting  $Ep$  at HEB station.

| HEB              | Training     |              |                |              | Testing      |              |                |              |
|------------------|--------------|--------------|----------------|--------------|--------------|--------------|----------------|--------------|
|                  | MAE          | RMSE         | R <sup>2</sup> | $E$          | MAE          | RMSE         | R <sup>2</sup> | $E$          |
| ANFIS-GP1        | 1.062        | 1.411        | 0.815          | 0.815        | 1.044        | 1.431        | 0.819          | 0.805        |
| ANFIS-GP2        | 1.226        | 1.68         | 0.737          | 0.737        | 1.082        | 1.471        | 0.797          | 0.794        |
| ANFIS-GP3        | 1.589        | 2.05         | 0.609          | 0.609        | 1.496        | 1.834        | 0.726          | 0.68         |
| ANFIS-GP4        | 2.681        | 2.972        | 0.178          | 0.178        | 2.862        | 3.171        | 0.071          | 0.044        |
| ANFIS-GP5        | 2.754        | 3.137        | 0.085          | 0.085        | 2.809        | 3.340        | 0.089          | -0.061       |
| ANFIS-GP6        | 0.865        | 1.225        | 0.86           | 0.86         | 0.781        | 1.089        | 0.894          | 0.887        |
| ANFIS-GP7        | 0.785        | 1.167        | 0.873          | 0.873        | 0.645        | 0.907        | 0.923          | 0.922        |
| ANFIS-GP8        | 0.429        | 0.601        | 0.966          | 0.966        | 0.517        | 0.751        | 0.956          | 0.946        |
| <b>ANFIS-GP9</b> | <b>0.378</b> | <b>0.521</b> | <b>0.975</b>   | <b>0.975</b> | <b>0.431</b> | <b>0.600</b> | <b>0.967</b>   | <b>0.966</b> |
| FG1              | 1.031        | 1.371        | 0.825          | 0.825        | 1.031        | 1.507        | 0.816          | 0.765        |
| FG2              | 1.151        | 1.632        | 0.752          | 0.752        | 1.077        | 1.502        | 0.786          | 0.786        |
| FG3              | 1.528        | 2.008        | 0.625          | 0.625        | 1.354        | 1.798        | 0.74           | 0.696        |
| FG4              | 2.487        | 2.877        | 0.23           | 0.23         | 2.677        | 3.083        | 0.118          | 0.096        |
| FG5              | 2.708        | 3.103        | 0.104          | 0.104        | 2.806        | 3.304        | 0.091          | -0.039       |
| FG6              | 0.719        | 1.071        | 0.893          | 0.893        | 0.688        | 1.178        | 0.891          | 0.870        |
| FG7              | 0.67         | 1.002        | 0.907          | 0.907        | 0.673        | 1.059        | 0.897          | 0.824        |
| FG8              | 0.39         | 0.563        | 0.971          | 0.97         | 0.45         | 0.638        | 0.969          | 0.961        |
| <b>FG9</b>       | <b>0.325</b> | <b>0.451</b> | <b>0.981</b>   | <b>0.981</b> | <b>0.421</b> | <b>0.554</b> | <b>0.971</b>   | <b>0.971</b> |
| GRNN1            | 1.026        | 1.364        | 0.827          | 0.827        | 1.031        | 1.479        | 0.814          | 0.792        |
| GRNN2            | 1.138        | 1.617        | 0.757          | 0.757        | 1.054        | 1.472        | 0.796          | 0.794        |
| GRNN3            | 1.519        | 2            | 0.628          | 0.627        | 1.379        | 1.816        | 0.738          | 0.686        |
| GRNN4            | 2.451        | 2.835        | 0.253          | 0.252        | 2.685        | 3.087        | 0.113          | 0.094        |
| GRNN5            | 2.72         | 3.097        | 0.122          | 0.108        | 2.795        | 3.272        | 0.085          | -0.018       |
| GRNN6            | 0.549        | 0.897        | 0.926          | 0.925        | 0.734        | 1.218        | 0.878          | 0.859        |
| GRNN7            | 0.453        | 0.71         | 0.954          | 0.953        | 0.696        | 1.124        | 0.887          | 0.88         |
| GRNN8            | 0.155        | 0.246        | 0.994          | 0.994        | 0.543        | 0.962        | 0.922          | 0.912        |
| <b>GRNN9</b>     | <b>0.047</b> | <b>0.09</b>  | <b>0.999</b>   | <b>0.999</b> | <b>0.529</b> | <b>0.856</b> | <b>0.932</b>   | <b>0.930</b> |
| LSSVM1           | 1.027        | 1.371        | 0.825          | 0.825        | 1.02         | 1.461        | 0.819          | 0.797        |
| LSSVM2           | 1.131        | 1.619        | 0.756          | 0.756        | 1.059        | 1.487        | 0.791          | 0.79         |
| LSSVM3           | 1.684        | 2.133        | 0.604          | 0.577        | 1.556        | 1.949        | 0.712          | 0.639        |
| LSSVM4           | 2.493        | 2.876        | 0.231          | 0.231        | 2.685        | 3.094        | 0.113          | 0.09         |
| LSSVM5           | 2.736        | 3.117        | 0.097          | 0.096        | 2.806        | 3.320        | 0.091          | -0.048       |
| LSSVM6           | 0.838        | 1.205        | 0.866          | 0.865        | 0.79         | 1.169        | 0.879          | 0.87         |
| LSSVM7           | 0.901        | 1.267        | 0.853          | 0.851        | 0.761        | 1.031        | 0.9            | 0.899        |
| LSSVM8           | 0.813        | 1.128        | 0.893          | 0.882        | 0.826        | 1.090        | 0.893          | 0.887        |
| <b>LSSVM9</b>    | <b>0.483</b> | <b>0.667</b> | <b>0.960</b>   | <b>0.959</b> | <b>0.589</b> | <b>0.766</b> | <b>0.959</b>   | <b>0.944</b> |
| MARS1            | 1.038        | 1.371        | 0.825          | 0.825        | 1.064        | 1.581        | 0.805          | 0.762        |
| MARS2            | 1.088        | 1.543        | 0.779          | 0.779        | 1.093        | 1.563        | 0.771          | 0.768        |
| MARS3            | 1.537        | 2.01         | 0.624          | 0.624        | 1.369        | 1.795        | 0.744          | 0.694        |
| MARS4            | 2.457        | 2.852        | 0.243          | 0.243        | 2.731        | 3.133        | 0.103          | 0.066        |
| MARS5            | 2.695        | 3.079        | 0.118          | 0.118        | 2.795        | 3.303        | 0.097          | -0.037       |
| MARS6            | 0.659        | 0.972        | 0.912          | 0.912        | 0.806        | 1.390        | 0.861          | 0.816        |
| MARS7            | 0.659        | 0.972        | 0.912          | 0.912        | 0.806        | 1.390        | 0.861          | 0.816        |
| MARS8            | 0.543        | 0.708        | 0.953          | 0.953        | 0.597        | 0.933        | 0.935          | 0.917        |

|              |              |              |              |              |              |              |              |               |
|--------------|--------------|--------------|--------------|--------------|--------------|--------------|--------------|---------------|
| <b>MARS9</b> | <b>0.50</b>  | <b>0.635</b> | <b>0.962</b> | <b>0.962</b> | <b>0.570</b> | <b>0.749</b> | <b>0.950</b> | <b>0.947</b>  |
| MLP1         | 1.044        | 1.374        | 0.824        | 0.824        | 1.03         | 1.483        | 0.818        | 0.794         |
| MLP2         | 1.082        | 1.567        | 0.771        | 0.771        | 1.03         | 1.490        | 0.792        | 0.791         |
| MLP3         | 1.135        | 1.618        | 0.757        | 0.757        | 1.04         | 1.460        | 0.798        | 0.797         |
| <b>MLP4</b>  | <b>2.539</b> | <b>2.893</b> | <b>0.221</b> | <b>0.221</b> | <b>2.729</b> | <b>3.107</b> | <b>0.108</b> | <b>0.082</b>  |
| <b>MLP5</b>  | <b>2.711</b> | <b>3.107</b> | <b>0.102</b> | <b>0.102</b> | <b>2.807</b> | <b>3.304</b> | <b>0.090</b> | <b>-0.038</b> |
| MLP6         | 0.655        | 0.963        | 0.914        | 0.914        | 0.716        | 1.148        | 0.892        | 0.891         |
| MLP7         | 0.608        | 0.908        | 0.923        | 0.923        | 0.584        | 0.879        | 0.928        | 0.923         |
| MLP8         | 0.314        | 0.458        | 0.98         | 0.98         | 0.409        | 0.607        | 0.970        | 0.966         |
| <b>MLP9</b>  | <b>0.279</b> | <b>0.398</b> | <b>0.985</b> | <b>0.985</b> | <b>0.314</b> | <b>0.405</b> | <b>0.988</b> | <b>0.984</b>  |
| SS           | 0.954        | 1.327        | 0.838        | 0.838        | 0.822        | 1.152        | 0.886        | 0.885         |
| MLR          | 0.825        | 1.05         | 0.897        | 0.897        | 0.874        | 1.160        | 0.875        | 0.875         |

Table 5. Comparisons of different models for predicting  $Ep$  at ALT station.

| ALT              | Training     |              |                |              | Testing      |              |                |              |
|------------------|--------------|--------------|----------------|--------------|--------------|--------------|----------------|--------------|
|                  | MAE          | RMSE         | R <sup>2</sup> | E            | MAE          | RMSE         | R <sup>2</sup> | E            |
| ANFIS-GP1        | 1.19         | 1.597        | 0.841          | 0.841        | 1.003        | 1.268        | 0.896          | 0.848        |
| ANFIS-GP2        | 1.19         | 1.506        | 0.859          | 0.859        | 1.110        | 1.435        | 0.884          | 0.806        |
| ANFIS-GP3        | 1.345        | 1.763        | 0.807          | 0.807        | 1.214        | 1.601        | 0.844          | 0.758        |
| <b>ANFIS-GP4</b> | <b>1.364</b> | <b>1.732</b> | <b>0.813</b>   | <b>0.813</b> | <b>1.269</b> | <b>1.632</b> | <b>0.769</b>   | <b>0.749</b> |
| <b>ANFIS-GP5</b> | <b>2.354</b> | <b>2.848</b> | <b>0.495</b>   | <b>0.495</b> | <b>2.161</b> | <b>2.578</b> | <b>0.379</b>   | <b>0.373</b> |
| ANFIS-GP6        | 0.535        | 0.786        | 0.962          | 0.962        | 0.707        | 1.013        | 0.973          | 0.903        |
| ANFIS-GP7        | 0.494        | 0.737        | 0.966          | 0.966        | 0.691        | 1.012        | 0.977          | 0.903        |
| ANFIS-GP8        | 0.286        | 0.411        | 0.99           | 0.99         | 0.398        | 0.586        | 0.984          | 0.968        |
| <b>ANFIS-GP9</b> | <b>0.241</b> | <b>0.351</b> | <b>0.992</b>   | <b>0.992</b> | <b>0.371</b> | <b>0.545</b> | <b>0.987</b>   | <b>0.972</b> |
| FG1              | 1.079        | 1.398        | 0.878          | 0.878        | 0.994        | 1.300        | 0.891          | 0.838        |
| FG2              | 0.78         | 1.065        | 0.929          | 0.929        | 0.953        | 1.29         | 0.928          | 0.846        |
| FG3              | 1.052        | 1.375        | 0.882          | 0.882        | 1.002        | 1.328        | 0.92           | 0.835        |
| <b>FG4</b>       | <b>1.251</b> | <b>1.682</b> | <b>0.824</b>   | <b>0.824</b> | <b>1.183</b> | <b>1.714</b> | <b>0.745</b>   | <b>0.724</b> |
| <b>FG5</b>       | <b>2.237</b> | <b>2.79</b>  | <b>0.515</b>   | <b>0.515</b> | <b>2.099</b> | <b>2.554</b> | <b>0.404</b>   | <b>0.386</b> |
| FG6              | 0.45         | 0.703        | 0.969          | 0.969        | 0.670        | 1.027        | 0.971          | 0.899        |
| FG7              | 0.49         | 0.717        | 0.968          | 0.968        | 0.697        | 1.043        | 0.971          | 0.898        |
| FG8              | 0.266        | 0.38         | 0.991          | 0.991        | 0.391        | 0.575        | 0.987          | 0.967        |
| <b>FG9</b>       | <b>0.253</b> | <b>0.343</b> | <b>0.993</b>   | <b>0.993</b> | <b>0.394</b> | <b>0.570</b> | <b>0.988</b>   | <b>0.969</b> |
| GRNN1            | 1.052        | 1.38         | 0.882          | 0.881        | 0.951        | 1.229        | 0.90           | 0.858        |
| GRNN2            | 0.784        | 1.08         | 0.928          | 0.927        | 0.931        | 1.249        | 0.931          | 0.853        |
| GRNN3            | 1.041        | 1.368        | 0.884          | 0.883        | 0.977        | 1.290        | 0.92           | 0.843        |
| <b>GRNN4</b>     | <b>1.279</b> | <b>1.688</b> | <b>0.823</b>   | <b>0.823</b> | <b>1.152</b> | <b>1.631</b> | <b>0.763</b>   | <b>0.749</b> |
| <b>GRNN5</b>     | <b>2.439</b> | <b>2.859</b> | <b>0.512</b>   | <b>0.491</b> | <b>2.239</b> | <b>2.560</b> | <b>0.397</b>   | <b>0.382</b> |
| GRNN6            | 0.431        | 0.683        | 0.971          | 0.971        | 0.657        | 0.987        | 0.975          | 0.908        |
| GRNN7            | 0.384        | 0.629        | 0.975          | 0.975        | 0.705        | 1.015        | 0.978          | 0.903        |
| <b>GRNN8</b>     | <b>0.173</b> | <b>0.278</b> | <b>0.995</b>   | <b>0.995</b> | <b>0.468</b> | <b>0.658</b> | <b>0.988</b>   | <b>0.959</b> |
| GRNN9            | 0.095        | 0.165        | 0.998          | 0.998        | 0.48         | 0.683        | 0.984          | 0.956        |
| LSSVM1           | 1.075        | 1.392        | 0.879          | 0.879        | 0.993        | 1.285        | 0.894          | 0.844        |
| LSSVM2           | 0.765        | 1.047        | 0.932          | 0.932        | 0.96         | 1.299        | 0.926          | 0.84         |

|        |       |       |       |       |       |       |       |       |
|--------|-------|-------|-------|-------|-------|-------|-------|-------|
| LSSVM3 | 1.447 | 1.839 | 0.827 | 0.789 | 1.034 | 1.391 | 0.863 | 0.817 |
| LSSVM4 | 1.278 | 1.692 | 0.822 | 0.822 | 1.192 | 1.668 | 0.753 | 0.738 |
| LSSVM5 | 2.335 | 2.814 | 0.508 | 0.507 | 2.189 | 2.565 | 0.391 | 0.379 |
| LSSVM6 | 0.520 | 0.769 | 0.964 | 0.963 | 0.673 | 0.954 | 0.973 | 0.914 |
| LSSVM7 | 0.617 | 0.868 | 0.955 | 0.953 | 0.749 | 0.945 | 0.973 | 0.916 |
| LSSVM8 | 0.709 | 0.927 | 0.953 | 0.946 | 0.63  | 0.770 | 0.968 | 0.944 |
| LSSVM9 | 0.356 | 0.53  | 0.983 | 0.982 | 0.48  | 0.650 | 0.986 | 0.960 |
| MARS1  | 1.032 | 1.371 | 0.883 | 0.883 | 0.956 | 1.269 | 0.899 | 0.848 |
| MARS2  | 0.748 | 1.029 | 0.934 | 0.934 | 0.927 | 1.280 | 0.929 | 0.832 |
| MARS3  | 1.043 | 1.356 | 0.886 | 0.886 | 1.043 | 1.367 | 0.916 | 0.824 |
| MARS4  | 1.216 | 1.645 | 0.832 | 0.832 | 1.159 | 1.715 | 0.743 | 0.723 |
| MARS5  | 2.161 | 2.714 | 0.542 | 0.542 | 2.328 | 2.858 | 0.292 | 0.229 |
| MARS6  | 0.437 | 0.657 | 0.973 | 0.973 | 0.641 | 0.996 | 0.975 | 0.906 |
| MARS7  | 0.438 | 0.658 | 0.973 | 0.973 | 0.644 | 1.000 | 0.975 | 0.906 |
| MARS8  | 0.29  | 0.411 | 0.989 | 0.989 | 0.428 | 0.655 | 0.985 | 0.96  |
| MARS9  | 0.276 | 0.382 | 0.991 | 0.991 | 0.403 | 0.622 | 0.987 | 0.964 |
| MLP1   | 1.03  | 1.363 | 0.884 | 0.884 | 0.951 | 1.268 | 0.897 | 0.849 |
| MLP2   | 0.787 | 1.07  | 0.929 | 0.929 | 0.951 | 1.282 | 0.93  | 0.845 |
| MLP3   | 0.752 | 1.039 | 0.933 | 0.933 | 0.93  | 1.280 | 0.929 | 0.846 |
| MLP4   | 1.25  | 1.683 | 0.824 | 0.824 | 1.183 | 1.699 | 0.751 | 0.727 |
| MLP5   | 2.266 | 2.805 | 0.51  | 0.51  | 2.089 | 2.542 | 0.405 | 0.391 |
| MLP6   | 0.445 | 0.689 | 0.97  | 0.97  | 0.667 | 1.033 | 0.971 | 0.900 |
| MLP7   | 0.521 | 0.769 | 0.963 | 0.963 | 0.659 | 1.017 | 0.974 | 0.902 |
| MLP8   | 0.234 | 0.34  | 0.993 | 0.993 | 0.348 | 0.523 | 0.989 | 0.974 |
| MLP9   | 0.161 | 0.211 | 0.989 | 0.989 | 0.190 | 0.265 | 0.989 | 0.978 |
| SS     | 0.539 | 0.761 | 0.964 | 0.964 | 0.681 | 1.053 | 0.963 | 0.963 |
| MLR    | 0.712 | 0.89  | 0.951 | 0.951 | 0.740 | 0.861 | 0.969 | 0.968 |

Table 6. Comparisons of different models for predicting  $Ep$  at MQ station.

| MQ        | Training |       |                |       | Testing |       |                |       |
|-----------|----------|-------|----------------|-------|---------|-------|----------------|-------|
|           | MAE      | RMSE  | R <sup>2</sup> | E     | MAE     | RMSE  | R <sup>2</sup> | E     |
| ANFIS-GP1 | 1.337    | 1.76  | 0.85           | 0.85  | 1.133   | 1.396 | 0.941          | 0.889 |
| ANFIS-GP2 | 1.33     | 1.698 | 0.86           | 0.86  | 1.203   | 1.587 | 0.863          | 0.856 |
| ANFIS-GP3 | 2.467    | 3.11  | 0.53           | 0.53  | 2.453   | 3.045 | 0.55           | 0.47  |
| ANFIS-GP4 | 3.895    | 4.324 | 0.092          | 0.092 | 3.758   | 4.146 | 0.035          | 0.018 |
| ANFIS-GP5 | 3.256    | 3.807 | 0.296          | 0.296 | 2.879   | 3.385 | 0.353          | 0.345 |
| ANFIS-GP6 | 0.83     | 1.178 | 0.933          | 0.933 | 0.868   | 1.220 | 0.952          | 0.915 |
| ANFIS-GP7 | 0.828    | 1.165 | 0.934          | 0.934 | 0.882   | 1.229 | 0.951          | 0.914 |
| ANFIS-GP8 | 0.648    | 0.886 | 0.962          | 0.962 | 0.608   | 0.810 | 0.981          | 0.963 |
| ANFIS-GP9 | 0.474    | 0.66  | 0.979          | 0.979 | 0.512   | 0.646 | 0.987          | 0.976 |
| FG1       | 1.297    | 1.735 | 0.854          | 0.854 | 1.112   | 1.412 | 0.926          | 0.886 |
| FG2       | 1.263    | 1.638 | 0.87           | 0.87  | 1.198   | 1.555 | 0.87           | 0.862 |
| FG3       | 2.447    | 3.057 | 0.546          | 0.546 | 2.373   | 2.953 | 0.58           | 0.504 |
| FG4       | 3.871    | 4.307 | 0.10           | 0.1   | 3.746   | 4.130 | 0.04           | 0.026 |
| FG5       | 3.215    | 3.782 | 0.306          | 0.306 | 2.83    | 3.344 | 0.366          | 0.361 |

|               |              |              |              |              |              |              |              |              |
|---------------|--------------|--------------|--------------|--------------|--------------|--------------|--------------|--------------|
| FG6           | 0.828        | 1.178        | 0.933        | 0.933        | 0.854        | 1.196        | 0.952        | 0.917        |
| FG7           | 0.795        | 1.13         | 0.938        | 0.938        | 0.923        | 1.335        | 0.942        | 0.914        |
| FG8           | 0.608        | 0.81         | 0.968        | 0.968        | 0.636        | 0.805        | 0.978        | 0.968        |
| <b>FG9</b>    | <b>0.456</b> | <b>0.614</b> | <b>0.983</b> | <b>0.973</b> | <b>0.435</b> | <b>0.574</b> | <b>0.99</b>  | <b>0.974</b> |
| GRNN1         | 1.289        | 1.725        | 0.856        | 0.856        | 1.076        | 1.386        | 0.927        | 0.890        |
| GRNN2         | 1.225        | 1.593        | 0.877        | 0.877        | 1.148        | 1.504        | 0.876        | 0.871        |
| GRNN3         | 2.441        | 3.04         | 0.552        | 0.551        | 2.35         | 2.909        | 0.585        | 0.516        |
| <b>GRNN4</b>  | <b>3.845</b> | <b>4.281</b> | <b>0.112</b> | <b>0.111</b> | <b>3.701</b> | <b>4.091</b> | <b>0.051</b> | <b>0.044</b> |
| <b>GRNN5</b>  | <b>3.379</b> | <b>3.85</b>  | <b>0.304</b> | <b>0.281</b> | <b>3.026</b> | <b>3.429</b> | <b>0.363</b> | <b>0.328</b> |
| GRNN6         | 0.688        | 1.002        | 0.951        | 0.951        | 0.777        | 1.099        | 0.954        | 0.931        |
| GRNN7         | 0.508        | 0.761        | 0.972        | 0.972        | 0.849        | 1.210        | 0.948        | 0.916        |
| GRNN8         | 0.178        | 0.291        | 0.996        | 0.996        | 0.66         | 0.947        | 0.966        | 0.949        |
| <b>GRNN9</b>  | <b>0.055</b> | <b>0.126</b> | <b>0.999</b> | <b>0.999</b> | <b>0.599</b> | <b>0.832</b> | <b>0.973</b> | <b>0.960</b> |
| LSSVM1        | 1.295        | 1.732        | 0.854        | 0.854        | 1.107        | 1.411        | 0.927        | 0.886        |
| LSSVM2        | 1.259        | 1.634        | 0.87         | 0.87         | 1.202        | 1.561        | 0.869        | 0.861        |
| LSSVM3        | 2.713        | 3.216        | 0.522        | 0.498        | 2.523        | 2.983        | 0.558        | 0.492        |
| <b>LSSVM4</b> | <b>3.861</b> | <b>4.296</b> | <b>0.105</b> | <b>0.104</b> | <b>3.711</b> | <b>4.094</b> | <b>0.052</b> | <b>0.043</b> |
| <b>LSSVM5</b> | <b>3.242</b> | <b>3.789</b> | <b>0.304</b> | <b>0.303</b> | <b>2.872</b> | <b>3.369</b> | <b>0.358</b> | <b>0.352</b> |
| LSSVM6        | 0.841        | 1.182        | 0.933        | 0.932        | 0.858        | 1.166        | 0.951        | 0.922        |
| LSSVM7        | 0.911        | 1.225        | 0.929        | 0.927        | 0.933        | 1.200        | 0.95         | 0.918        |
| LSSVM8        | 0.982        | 1.243        | 0.937        | 0.925        | 0.919        | 1.118        | 0.960        | 0.929        |
| <b>LSSVM9</b> | <b>0.549</b> | <b>0.747</b> | <b>0.974</b> | <b>0.973</b> | <b>0.544</b> | <b>0.711</b> | <b>0.982</b> | <b>0.971</b> |
| MARS1         | 1.352        | 1.76         | 0.85         | 0.85         | 1.133        | 1.403        | 0.936        | 0.888        |
| MARS2         | 1.076        | 1.46         | 0.897        | 0.897        | 1.08         | 1.472        | 0.888        | 0.876        |
| MARS3         | 2.419        | 3.039        | 0.552        | 0.552        | 2.436        | 2.996        | 0.564        | 0.487        |
| <b>MARS4</b>  | <b>3.829</b> | <b>4.282</b> | <b>0.11</b>  | <b>0.11</b>  | <b>3.751</b> | <b>4.125</b> | <b>0.046</b> | <b>0.028</b> |
| <b>MARS5</b>  | <b>3.225</b> | <b>3.813</b> | <b>0.294</b> | <b>0.294</b> | <b>2.878</b> | <b>3.391</b> | <b>0.35</b>  | <b>0.343</b> |
| MARS6         | 0.804        | 1.127        | 0.938        | 0.938        | 0.921        | 1.247        | 0.948        | 0.911        |
| MARS7         | 0.807        | 1.126        | 0.938        | 0.938        | 0.97         | 1.290        | 0.95         | 0.905        |
| MARS8         | 0.668        | 0.87         | 0.963        | 0.963        | 0.735        | 0.929        | 0.973        | 0.951        |
| <b>MARS9</b>  | <b>0.546</b> | <b>0.72</b>  | <b>0.975</b> | <b>0.975</b> | <b>0.627</b> | <b>0.826</b> | <b>0.977</b> | <b>0.961</b> |
| MLP1          | 1.297        | 1.735        | 0.854        | 0.854        | 1.107        | 1.408        | 0.928        | 0.887        |
| MLP2          | 1.057        | 1.458        | 0.897        | 0.897        | 1.113        | 1.492        | 0.888        | 0.873        |
| MLP3          | 1.139        | 1.524        | 0.887        | 0.887        | 1.108        | 1.488        | 0.884        | 0.872        |
| <b>MLP4</b>   | <b>3.833</b> | <b>4.289</b> | <b>0.107</b> | <b>0.107</b> | <b>3.676</b> | <b>4.069</b> | <b>0.063</b> | <b>0.054</b> |
| <b>MLP5</b>   | <b>3.179</b> | <b>3.761</b> | <b>0.313</b> | <b>0.313</b> | <b>2.81</b>  | <b>3.329</b> | <b>0.371</b> | <b>0.367</b> |
| MLP6          | 0.724        | 1.026        | 0.949        | 0.949        | 0.797        | 1.074        | 0.96         | 0.935        |
| MLP7          | 0.742        | 1.064        | 0.945        | 0.945        | 0.821        | 1.113        | 0.959        | 0.929        |
| MLP8          | 0.538        | 0.738        | 0.974        | 0.974        | 0.538        | 0.716        | 0.981        | 0.97         |
| <b>MLP9</b>   | <b>0.384</b> | <b>0.532</b> | <b>0.986</b> | <b>0.986</b> | <b>0.358</b> | <b>0.489</b> | <b>0.99</b>  | <b>0.986</b> |
| SS            | 0.922        | 1.281        | 0.92         | 0.92         | 1.039        | 1.389        | 0.944        | 0.942        |
| MLR           | 0.77         | 0.967        | 0.955        | 0.955        | 0.784        | 0.921        | 0.972        | 0.971        |

Table 7. Comparisons of different models for predicting  $Ep$  at BJ station.

| BJ               | Training     |              |                |              | Testing      |              |                |              |
|------------------|--------------|--------------|----------------|--------------|--------------|--------------|----------------|--------------|
|                  | MAE          | RMSE         | R <sup>2</sup> | E            | MAE          | RMSE         | R <sup>2</sup> | E            |
| ANFIS-GP1        | 0.872        | 1.205        | 0.826          | 0.826        | 0.749        | 0.956        | 0.922          | 0.868        |
| ANFIS-GP2        | 1.439        | 1.907        | 0.564          | 0.564        | 1.294        | 1.554        | 0.662          | 0.650        |
| ANFIS-GP3        | 1.431        | 1.818        | 0.603          | 0.603        | 1.482        | 1.880        | 0.561          | 0.488        |
| ANFIS-GP4        | 2.306        | 2.881        | 0.005          | 0.005        | 2.223        | 2.608        | 0.019          | 0.014        |
| ANFIS-GP5        | 2.345        | 2.865        | 0.015          | 0.015        | 2.22         | 2.577        | 0.07           | 0.038        |
| ANFIS-GP6        | 0.846        | 1.189        | 0.831          | 0.831        | 0.717        | 0.923        | 0.921          | 0.877        |
| ANFIS-GP7        | 0.742        | 1.071        | 0.862          | 0.862        | 0.688        | 0.972        | 0.909          | 0.863        |
| ANFIS-GP8        | 0.464        | 0.735        | 0.935          | 0.935        | 0.384        | 0.510        | 0.965          | 0.962        |
| <b>ANFIS-GP9</b> | <b>0.424</b> | <b>0.657</b> | <b>0.948</b>   | <b>0.948</b> | <b>0.361</b> | <b>0.48</b>  | <b>0.971</b>   | <b>0.967</b> |
| FG1              | 0.835        | 1.127        | 0.848          | 0.848        | 0.823        | 1.075        | 0.914          | 0.828        |
| FG2              | 1.416        | 1.891        | 0.571          | 0.571        | 1.256        | 1.544        | 0.665          | 0.653        |
| FG3              | 1.387        | 1.733        | 0.64           | 0.64         | 1.483        | 1.846        | 0.561          | 0.504        |
| FG4              | 2.244        | 2.839        | 0.033          | 0.033        | 2.23         | 2.653        | 0.001          | -0.051       |
| FG5              | 2.288        | 2.822        | 0.045          | 0.045        | 2.234        | 2.608        | 0.02           | 0.015        |
| FG6              | 0.742        | 1.063        | 0.864          | 0.864        | 0.688        | 0.997        | 0.922          | 0.855        |
| FG7              | 0.721        | 1.052        | 0.867          | 0.867        | 0.679        | 0.959        | 0.926          | 0.869        |
| FG8              | 0.451        | 0.721        | 0.938          | 0.938        | 0.394        | 0.484        | 0.971          | 0.965        |
| <b>FG9</b>       | <b>0.438</b> | <b>0.662</b> | <b>0.947</b>   | <b>0.947</b> | <b>0.355</b> | <b>0.443</b> | <b>0.977</b>   | <b>0.972</b> |
| GRNN1            | 0.819        | 1.114        | 0.852          | 0.851        | 0.811        | 1.062        | 0.916          | 0.837        |
| GRNN2            | 1.379        | 1.852        | 0.589          | 0.588        | 1.23         | 1.520        | 0.678          | 0.665        |
| GRNN3            | 1.347        | 1.702        | 0.654          | 0.653        | 1.487        | 1.850        | 0.559          | 0.504        |
| GRNN4            | 2.262        | 2.827        | 0.044          | 0.041        | 2.253        | 2.667        | 0.001          | -0.03        |
| GRNN5            | 2.32         | 2.856        | 0.023          | 0.021        | 2.224        | 2.591        | 0.101          | 0.027        |
| GRNN6            | 0.626        | 0.924        | 0.898          | 0.898        | 0.657        | 0.939        | 0.904          | 0.872        |
| GRNN7            | 0.473        | 0.754        | 0.932          | 0.932        | 0.68         | 0.967        | 0.885          | 0.865        |
| GRNN8            | 0.185        | 0.348        | 0.986          | 0.985        | 0.403        | 0.541        | 0.958          | 0.958        |
| <b>GRNN9</b>     | <b>0.166</b> | <b>0.301</b> | <b>0.989</b>   | <b>0.989</b> | <b>0.356</b> | <b>0.473</b> | <b>0.968</b>   | <b>0.967</b> |
| LSSVM1           | 0.831        | 1.121        | 0.849          | 0.849        | 0.823        | 1.068        | 0.916          | 0.835        |
| LSSVM2           | 1.409        | 1.883        | 0.575          | 0.575        | 1.238        | 1.525        | 0.677          | 0.663        |
| LSSVM3           | 1.502        | 1.877        | 0.606          | 0.577        | 1.522        | 1.865        | 0.547          | 0.496        |
| LSSVM4           | 2.281        | 2.851        | 0.025          | 0.025        | 2.236        | 2.630        | 0.008          | -0.18        |
| LSSVM5           | 2.332        | 2.858        | 0.02           | 0.02         | 2.216        | 2.579        | 0.093          | 0.036        |
| LSSVM6           | 0.775        | 1.117        | 0.852          | 0.85         | 0.647        | 0.927        | 0.926          | 0.875        |
| LSSVM7           | 0.785        | 1.129        | 0.849          | 0.847        | 0.66         | 0.932        | 0.92           | 0.874        |
| LSSVM8           | 0.733        | 1.074        | 0.876          | 0.862        | 0.619        | 0.823        | 0.926          | 0.902        |
| <b>LSSVM9</b>    | <b>0.481</b> | <b>0.753</b> | <b>0.934</b>   | <b>0.932</b> | <b>0.335</b> | <b>0.437</b> | <b>0.974</b>   | <b>0.972</b> |
| MARS1            | 0.835        | 1.129        | 0.847          | 0.847        | 0.857        | 1.080        | 0.914          | 0.831        |
| MARS2            | 1.364        | 1.832        | 0.597          | 0.597        | 1.282        | 1.607        | 0.659          | 0.626        |
| MARS3            | 1.359        | 1.717        | 0.646          | 0.646        | 1.48         | 1.844        | 0.558          | 0.507        |
| MARS4            | 2.183        | 2.728        | 0.107          | 0.107        | 2.392        | 2.962        | 0.001          | -0.271       |
| MARS5            | 2.323        | 2.86         | 0.019          | 0.019        | 2.245        | 2.616        | 0.01           | 0.008        |
| MARS6            | 0.694        | 0.974        | 0.886          | 0.886        | 0.685        | 0.986        | 0.904          | 0.859        |
| MARS7            | 0.691        | 0.977        | 0.886          | 0.886        | 0.671        | 0.967        | 0.911          | 0.865        |
| MARS8            | 0.52         | 0.767        | 0.929          | 0.929        | 0.5          | 0.603        | 0.963          | 0.947        |



|              |              |              |              |              |              |              |              |              |
|--------------|--------------|--------------|--------------|--------------|--------------|--------------|--------------|--------------|
| <b>MARS9</b> | <b>0.478</b> | <b>0.717</b> | <b>0.938</b> | <b>0.938</b> | <b>0.427</b> | <b>0.527</b> | <b>0.971</b> | <b>0.960</b> |
| MLP1         | 0.784        | 1.075        | 0.861        | 0.861        | 0.813        | 1.045        | 0.914        | 0.842        |
| MLP2         | 1.325        | 1.803        | 0.61         | 0.61         | 1.249        | 1.595        | 0.677        | 0.631        |
| MLP3         | 1.401        | 1.875        | 0.578        | 0.578        | 1.236        | 1.523        | 0.678        | 0.664        |
| <b>MLP4</b>  | <b>2.268</b> | <b>2.857</b> | <b>0.021</b> | <b>0.021</b> | <b>2.214</b> | <b>2.620</b> | <b>0.013</b> | <b>0.005</b> |
| <b>MLP5</b>  | <b>2.298</b> | <b>2.823</b> | <b>0.045</b> | <b>0.044</b> | <b>2.204</b> | <b>2.581</b> | <b>0.042</b> | <b>0.035</b> |
| MLP6         | 0.675        | 0.968        | 0.888        | 0.888        | 0.66         | 0.974        | 0.911        | 0.867        |
| MLP7         | 0.653        | 0.962        | 0.889        | 0.889        | 0.62         | 0.907        | 0.904        | 0.88         |
| <b>MLP8</b>  | <b>0.417</b> | <b>0.692</b> | <b>0.943</b> | <b>0.943</b> | <b>0.312</b> | <b>0.394</b> | <b>0.982</b> | <b>0.977</b> |
| MLP9         | 0.337        | 0.506        | 0.969        | 0.969        | 0.314        | 0.428        | 0.979        | 0.972        |
| SS           | 0.89         | 1.263        | 0.816        | 0.816        | 0.647        | 0.921        | 0.897        | 0.895        |
| MLR          | 0.614        | 0.879        | 0.907        | 0.907        | 0.514        | 0.648        | 0.946        | 0.945        |

Table 8. Comparisons of different models for predicting  $Ep$  at LSA station.

| LSA              | Training     |              |                |              | Testing      |              |                |              |
|------------------|--------------|--------------|----------------|--------------|--------------|--------------|----------------|--------------|
|                  | MAE          | RMSE         | R <sup>2</sup> | E            | MAE          | RMSE         | R <sup>2</sup> | E            |
| ANFIS-GP1        | 1.327        | 1.718        | 0.411          | 0.411        | 1.072        | 1.424        | 0.594          | 0.581        |
| ANFIS-GP2        | 1.245        | 1.523        | 0.536          | 0.536        | 1.192        | 1.417        | 0.601          | 0.585        |
| ANFIS-GP3        | 1.821        | 2.218        | 0.017          | 0.017        | 1.796        | 2.148        | 0.055          | 0.046        |
| <b>ANFIS-GP4</b> | <b>1.772</b> | <b>2.196</b> | <b>0.037</b>   | <b>0.037</b> | <b>1.794</b> | <b>2.127</b> | <b>0.072</b>   | <b>0.065</b> |
| <b>ANFIS-GP5</b> | <b>1.721</b> | <b>2.11</b>  | <b>0.111</b>   | <b>0.111</b> | <b>1.695</b> | <b>2.033</b> | <b>0.178</b>   | <b>0.146</b> |
| ANFIS-GP6        | 1.149        | 1.471        | 0.568          | 0.568        | 1.046        | 1.304        | 0.651          | 0.648        |
| ANFIS-GP7        | 0.966        | 1.223        | 0.701          | 0.701        | 0.875        | 1.082        | 0.761          | 0.758        |
| <b>ANFIS-GP8</b> | <b>0.529</b> | <b>0.675</b> | <b>0.909</b>   | <b>0.909</b> | <b>0.73</b>  | <b>0.907</b> | <b>0.896</b>   | <b>0.830</b> |
| ANFIS-GP9        | 0.478        | 0.61         | 0.926          | 0.926        | 0.816        | 1.038        | 0.875          | 0.777        |
| FG1              | 1.324        | 1.715        | 0.413          | 0.413        | 1.073        | 1.415        | 0.600          | 0.584        |
| FG2              | 1.151        | 1.465        | 0.571          | 0.571        | 1.159        | 1.392        | 0.621          | 0.600        |
| FG3              | 1.803        | 2.169        | 0.06           | 0.06         | 1.771        | 2.093        | 0.118          | 0.115        |
| <b>FG4</b>       | <b>1.627</b> | <b>2.072</b> | <b>0.143</b>   | <b>0.143</b> | <b>1.64</b>  | <b>2.036</b> | <b>0.145</b>   | <b>0.141</b> |
| <b>FG5</b>       | <b>1.683</b> | <b>2.092</b> | <b>0.125</b>   | <b>0.125</b> | <b>1.704</b> | <b>2.022</b> | <b>0.163</b>   | <b>0.152</b> |
| FG6              | 1.044        | 1.381        | 0.619          | 0.619        | 0.987        | 1.201        | 0.725          | 0.705        |
| FG7              | 0.968        | 1.215        | 0.705          | 0.705        | 0.896        | 1.099        | 0.757          | 0.737        |
| FG8              | 0.499        | 0.631        | 0.921          | 0.921        | 0.767        | 0.925        | 0.903          | 0.823        |
| <b>FG9</b>       | <b>0.491</b> | <b>0.61</b>  | <b>0.926</b>   | <b>0.926</b> | <b>0.729</b> | <b>0.886</b> | <b>0.914</b>   | <b>0.86</b>  |
| GRNN1            | 1.296        | 1.692        | 0.429          | 0.428        | 1.094        | 1.436        | 0.587          | 0.574        |
| GRNN2            | 1.025        | 1.336        | 0.647          | 0.643        | 1.072        | 1.288        | 0.679          | 0.657        |
| GRNN3            | 1.783        | 2.152        | 0.077          | 0.075        | 1.762        | 2.080        | 0.134          | 0.105        |
| <b>GRNN4</b>     | <b>1.618</b> | <b>2.079</b> | <b>0.138</b>   | <b>0.136</b> | <b>1.586</b> | <b>1.971</b> | <b>0.209</b>   | <b>0.196</b> |
| <b>GRNN5</b>     | <b>1.712</b> | <b>2.108</b> | <b>0.119</b>   | <b>0.112</b> | <b>1.705</b> | <b>2.052</b> | <b>0.176</b>   | <b>0.13</b>  |
| GRNN6            | 0.791        | 1.067        | 0.778          | 0.773        | 0.83         | 1.044        | 0.786          | 0.775        |
| GRNN7            | 0.425        | 0.598        | 0.93           | 0.928        | 0.789        | 1.025        | 0.789          | 0.783        |
| GRNN8            | 0.137        | 0.202        | 0.992          | 0.992        | 0.566        | 0.711        | 0.914          | 0.895        |
| <b>GRNN9</b>     | <b>0.056</b> | <b>0.103</b> | <b>0.998</b>   | <b>0.998</b> | <b>0.459</b> | <b>0.592</b> | <b>0.933</b>   | <b>0.932</b> |
| LSSVM1           | 1.307        | 1.706        | 0.419          | 0.419        | 1.083        | 1.420        | 0.594          | 0.583        |
| LSSVM2           | 1.008        | 1.32         | 0.652          | 0.652        | 1.109        | 1.317        | 0.67           | 0.641        |

|        |       |       |       |       |       |       |       |       |
|--------|-------|-------|-------|-------|-------|-------|-------|-------|
| LSSVM3 | 1.811 | 2.209 | 0.027 | 0.025 | 1.791 | 2.144 | 0.07  | 0.05  |
| LSSVM4 | 1.663 | 2.113 | 0.109 | 0.107 | 1.638 | 2.010 | 0.187 | 0.165 |
| LSSVM5 | 1.721 | 2.109 | 0.112 | 0.111 | 1.692 | 2.030 | 0.182 | 0.148 |
| LSSVM6 | 1.107 | 1.431 | 0.592 | 0.591 | 1.033 | 1.268 | 0.681 | 0.668 |
| LSSVM7 | 1.073 | 1.336 | 0.65  | 0.644 | 0.915 | 1.119 | 0.759 | 0.741 |
| LSSVM8 | 0.957 | 1.199 | 0.766 | 0.713 | 0.869 | 1.043 | 0.833 | 0.775 |
| LSSVM9 | 0.57  | 0.753 | 0.894 | 0.887 | 0.582 | 0.702 | 0.926 | 0.898 |
| MARS1  | 1.311 | 1.72  | 0.409 | 0.409 | 1.091 | 1.440 | 0.585 | 0.571 |
| MARS2  | 1.012 | 1.318 | 0.653 | 0.653 | 1.098 | 1.299 | 0.683 | 0.651 |
| MARS3  | 1.82  | 2.182 | 0.049 | 0.049 | 1.766 | 2.089 | 0.12  | 0.097 |
| MARS4  | 1.663 | 2.098 | 0.121 | 0.121 | 1.639 | 2.020 | 0.159 | 0.157 |
| MARS5  | 1.694 | 2.096 | 0.122 | 0.122 | 1.705 | 2.037 | 0.161 | 0.143 |
| MARS6  | 0.917 | 1.23  | 0.698 | 0.698 | 0.947 | 1.176 | 0.735 | 0.714 |
| MARS7  | 0.94  | 1.227 | 0.699 | 0.699 | 0.913 | 1.135 | 0.746 | 0.734 |
| MARS8  | 0.501 | 0.641 | 0.918 | 0.918 | 0.762 | 0.929 | 0.91  | 0.822 |
| MARS9  | 0.516 | 0.662 | 0.912 | 0.912 | 0.668 | 0.818 | 0.924 | 0.862 |
| MLP1   | 1.308 | 1.707 | 0.418 | 0.418 | 1.073 | 1.413 | 0.596 | 0.586 |
| MLP2   | 0.992 | 1.307 | 0.659 | 0.658 | 1.111 | 1.313 | 0.675 | 0.647 |
| MLP3   | 0.994 | 1.316 | 0.654 | 0.654 | 1.108 | 1.312 | 0.675 | 0.647 |
| MLP4   | 1.601 | 2.075 | 0.14  | 0.14  | 1.561 | 1.956 | 0.216 | 0.207 |
| MLP5   | 1.686 | 2.095 | 0.124 | 0.124 | 1.703 | 2.022 | 0.162 | 0.155 |
| MLP6   | 0.883 | 1.187 | 0.719 | 0.719 | 0.918 | 1.123 | 0.754 | 0.746 |
| MLP7   | 0.686 | 0.91  | 0.835 | 0.835 | 0.728 | 0.958 | 0.825 | 0.803 |
| MLP8   | 0.397 | 0.503 | 0.949 | 0.949 | 0.629 | 0.771 | 0.928 | 0.877 |
| MLP9   | 0.522 | 0.681 | 0.907 | 0.907 | 0.53  | 0.638 | 0.936 | 0.916 |
| SS     | 1.198 | 1.577 | 0.515 | 0.515 | 0.969 | 1.307 | 0.652 | 0.652 |
| MLR    | 0.628 | 0.795 | 0.874 | 0.874 | 0.656 | 0.789 | 0.906 | 0.905 |

Table 9. Comparisons of different models for predicting  $Ep$  at CQ station.

| CQ        | Training |       |                |       | Testing |       |                |       |
|-----------|----------|-------|----------------|-------|---------|-------|----------------|-------|
|           | MAE      | RMSE  | R <sup>2</sup> | E     | MAE     | RMSE  | R <sup>2</sup> | E     |
| ANFIS-GP1 | 0.466    | 0.859 | 0.815          | 0.815 | 0.280   | 0.397 | 0.958          | 0.953 |
| ANFIS-GP2 | 0.82     | 1.189 | 0.645          | 0.645 | 0.693   | 0.959 | 0.748          | 0.726 |
| ANFIS-GP3 | 0.539    | 0.722 | 0.869          | 0.869 | 0.537   | 0.679 | 0.876          | 0.863 |
| ANFIS-GP4 | 1.631    | 1.958 | 0.036          | 0.036 | 1.486   | 1.743 | 0.553          | 0.096 |
| ANFIS-GP5 | 1.298    | 1.619 | 0.341          | 0.341 | 1.234   | 1.557 | 0.406          | 0.279 |
| ANFIS-GP6 | 0.416    | 0.786 | 0.845          | 0.845 | 0.316   | 0.398 | 0.959          | 0.953 |
| ANFIS-GP7 | 0.369    | 0.492 | 0.939          | 0.939 | 0.242   | 0.329 | 0.968          | 0.968 |
| ANFIS-GP8 | 0.225    | 0.29  | 0.979          | 0.979 | 0.224   | 0.312 | 0.976          | 0.971 |
| ANFIS-GP9 | 0.187    | 0.244 | 0.985          | 0.985 | 0.203   | 0.300 | 0.978          | 0.973 |
| FG1       | 0.467    | 0.805 | 0.837          | 0.837 | 0.294   | 0.375 | 0.963          | 0.959 |
| FG2       | 0.616    | 0.877 | 0.807          | 0.807 | 0.568   | 0.685 | 0.876          | 0.860 |
| FG3       | 0.474    | 0.672 | 0.887          | 0.887 | 0.479   | 0.607 | 0.905          | 0.890 |
| FG4       | 1.066    | 1.343 | 0.547          | 0.547 | 1.015   | 1.241 | 0.542          | 0.539 |
| FG5       | 1.291    | 1.601 | 0.356          | 0.356 | 1.308   | 1.659 | 0.324          | 0.183 |

|               |              |              |              |              |              |              |              |              |
|---------------|--------------|--------------|--------------|--------------|--------------|--------------|--------------|--------------|
| FG6           | 0.385        | 0.704        | 0.876        | 0.876        | 0.303        | 0.384        | 0.96         | 0.957        |
| FG7           | 0.396        | 0.572        | 0.918        | 0.918        | 0.294        | 0.385        | 0.958        | 0.956        |
| FG8           | 0.287        | 0.38         | 0.964        | 0.964        | 0.229        | 0.299        | 0.974        | 0.973        |
| <b>FG9</b>    | <b>0.195</b> | <b>0.25</b>  | <b>0.984</b> | <b>0.984</b> | <b>0.182</b> | <b>0.280</b> | <b>0.981</b> | <b>0.979</b> |
| GRNN1         | 0.437        | 0.746        | 0.861        | 0.86         | 0.284        | 0.374        | 0.963        | 0.958        |
| GRNN2         | 0.574        | 0.845        | 0.823        | 0.821        | 0.507        | 0.651        | 0.883        | 0.874        |
| GRNN3         | 0.453        | 0.652        | 0.893        | 0.893        | 0.473        | 0.610        | 0.902        | 0.889        |
| GRNN4         | 1.212        | 1.475        | 0.562        | 0.453        | 1.158        | 1.330        | 0.557        | 0.474        |
| GRNN5         | 1.318        | 1.617        | 0.354        | 0.342        | 1.253        | 1.548        | 0.395        | 0.287        |
| GRNN6         | 0.306        | 0.598        | 0.911        | 0.91         | 0.279        | 0.384        | 0.959        | 0.956        |
| GRNN7         | 0.197        | 0.278        | 0.981        | 0.981        | 0.243        | 0.328        | 0.968        | 0.968        |
| <b>GRNN8</b>  | <b>0.145</b> | <b>0.203</b> | <b>0.99</b>  | <b>0.99</b>  | <b>0.177</b> | <b>0.240</b> | <b>0.983</b> | <b>0.983</b> |
| GRNN9         | 0.227        | 0.308        | 0.977        | 0.977        | 0.234        | 0.297        | 0.975        | 0.974        |
| LSSVM1        | 0.449        | 0.758        | 0.856        | 0.856        | 0.282        | 0.377        | 0.961        | 0.958        |
| LSSVM2        | 0.552        | 0.825        | 0.829        | 0.829        | 0.503        | 0.650        | 0.888        | 0.874        |
| LSSVM3        | 0.687        | 0.862        | 0.887        | 0.813        | 0.625        | 0.765        | 0.906        | 0.826        |
| <b>LSSVM4</b> | <b>1.07</b>  | <b>1.345</b> | <b>0.548</b> | <b>0.545</b> | <b>1.003</b> | <b>1.222</b> | <b>0.556</b> | <b>0.555</b> |
| <b>LSSVM5</b> | <b>1.305</b> | <b>1.626</b> | <b>0.336</b> | <b>0.335</b> | <b>1.233</b> | <b>1.543</b> | <b>0.406</b> | <b>0.292</b> |
| LSSVM6        | 0.399        | 0.741        | 0.864        | 0.862        | 0.322        | 0.399        | 0.960        | 0.953        |
| LSSVM7        | 0.391        | 0.586        | 0.918        | 0.914        | 0.266        | 0.355        | 0.966        | 0.962        |
| LSSVM8        | 0.407        | 0.634        | 0.916        | 0.899        | 0.284        | 0.392        | 0.968        | 0.954        |
| <b>LSSVM9</b> | <b>0.313</b> | <b>0.482</b> | <b>0.944</b> | <b>0.941</b> | <b>0.219</b> | <b>0.290</b> | <b>0.976</b> | <b>0.975</b> |
| MARS1         | 0.5          | 0.753        | 0.858        | 0.858        | 0.274        | 0.357        | 0.964        | 0.962        |
| MARS2         | 0.559        | 0.806        | 0.837        | 0.837        | 0.509        | 0.653        | 0.888        | 0.873        |
| MARS3         | 0.453        | 0.664        | 0.889        | 0.889        | 0.466        | 0.599        | 0.904        | 0.904        |
| <b>MARS4</b>  | <b>0.974</b> | <b>1.234</b> | <b>0.617</b> | <b>0.617</b> | <b>1.09</b>  | <b>1.38</b>  | <b>0.466</b> | <b>0.433</b> |
| <b>MARS5</b>  | <b>1.236</b> | <b>1.51</b>  | <b>0.427</b> | <b>0.427</b> | <b>1.321</b> | <b>1.741</b> | <b>0.277</b> | <b>0.10</b>  |
| MARS6         | 0.354        | 0.617        | 0.904        | 0.904        | 0.333        | 0.444        | 0.949        | 0.941        |
| MARS7         | 0.336        | 0.48         | 0.942        | 0.942        | 0.292        | 0.372        | 0.959        | 0.959        |
| <b>MARS8</b>  | <b>0.273</b> | <b>0.426</b> | <b>0.954</b> | <b>0.954</b> | <b>0.221</b> | <b>0.300</b> | <b>0.973</b> | <b>0.973</b> |
| MARS9         | 0.267        | 0.417        | 0.956        | 0.956        | 0.25         | 0.323        | 0.970        | 0.969        |
| MLP1          | 0.419        | 0.733        | 0.865        | 0.865        | 0.27         | 0.371        | 0.96         | 0.959        |
| MLP2          | 0.55         | 0.81         | 0.835        | 0.835        | 0.509        | 0.658        | 0.887        | 0.872        |
| MLP3          | 0.568        | 0.845        | 0.82         | 0.82         | 0.502        | 0.637        | 0.893        | 0.877        |
| <b>MLP4</b>   | <b>1.052</b> | <b>1.338</b> | <b>0.55</b>  | <b>0.55</b>  | <b>0.999</b> | <b>1.231</b> | <b>0.55</b>  | <b>0.549</b> |
| <b>MLP5</b>   | <b>1.299</b> | <b>1.61</b>  | <b>0.348</b> | <b>0.348</b> | <b>1.263</b> | <b>1.591</b> | <b>0.381</b> | <b>0.247</b> |
| MLP6          | 0.334        | 0.65         | 0.894        | 0.894        | 0.266        | 0.355        | 0.966        | 0.947        |
| MLP7          | 0.252        | 0.348        | 0.97         | 0.969        | 0.218        | 0.296        | 0.975        | 0.971        |
| <b>MLP8</b>   | <b>0.185</b> | <b>0.239</b> | <b>0.986</b> | <b>0.986</b> | <b>0.167</b> | <b>0.230</b> | <b>0.985</b> | <b>0.984</b> |
| MLP9          | 0.161        | 0.211        | 0.989        | 0.989        | 0.189        | 0.265        | 0.985        | 0.979        |
| SS            | 0.379        | 0.786        | 0.847        | 0.847        | 0.226        | 0.307        | 0.973        | 0.971        |
| MLR           | 0.389        | 0.534        | 0.928        | 0.928        | 0.317        | 0.398        | 0.955        | 0.955        |

Table 10. Comparisons of different models for predicting  $Ep$  at HZ station.

| HZ        | Training |       |                |       | Testing |       |                |        |
|-----------|----------|-------|----------------|-------|---------|-------|----------------|--------|
|           | MAE      | RMSE  | R <sup>2</sup> | E     | MAE     | RMSE  | R <sup>2</sup> | E      |
| ANFIS-GP1 | 0.532    | 0.698 | 0.87           | 0.87  | 0.451   | 0.605 | 0.903          | 0.902  |
| ANFIS-GP2 | 0.72     | 1.001 | 0.734          | 0.734 | 0.728   | 0.965 | 0.754          | 0.728  |
| ANFIS-GP3 | 0.937    | 1.164 | 0.64           | 0.64  | 0.991   | 1.178 | 0.694          | 0.631  |
| ANFIS-GP4 | 1.567    | 1.94  | 0.001          | 0.001 | 1.59    | 1.943 | 0.017          | -0.004 |
| ANFIS-GP5 | 1.569    | 1.931 | 0.009          | 0.009 | 1.557   | 1.910 | 0.084          | 0.029  |
| ANFIS-GP6 | 0.377    | 0.521 | 0.928          | 0.928 | 0.333   | 0.448 | 0.948          | 0.947  |
| ANFIS-GP7 | 0.357    | 0.482 | 0.938          | 0.938 | 0.311   | 0.397 | 0.961          | 0.958  |
| ANFIS-GP8 | 0.272    | 0.356 | 0.966          | 0.966 | 0.329   | 0.427 | 0.965          | 0.951  |
| ANFIS-GP9 | 0.242    | 0.312 | 0.974          | 0.974 | 0.347   | 0.453 | 0.949          | 0.945  |
| FG1       | 0.519    | 0.686 | 0.875          | 0.875 | 0.438   | 0.590 | 0.908          | 0.907  |
| FG2       | 0.612    | 0.79  | 0.834          | 0.834 | 0.613   | 0.764 | 0.846          | 0.845  |
| FG3       | 0.943    | 1.151 | 0.648          | 0.648 | 1.012   | 1.188 | 0.701          | 0.624  |
| FG4       | 1.572    | 1.925 | 0.015          | 0.015 | 1.576   | 1.922 | 0.024          | 0.018  |
| FG5       | 1.519    | 1.862 | 0.08           | 0.08  | 1.67    | 2.014 | 0.02           | -0.081 |
| FG6       | 0.358    | 0.485 | 0.938          | 0.938 | 0.299   | 0.397 | 0.959          | 0.958  |
| FG7       | 0.344    | 0.462 | 0.943          | 0.943 | 0.29    | 0.373 | 0.965          | 0.963  |
| FG8       | 0.269    | 0.347 | 0.968          | 0.968 | 0.295   | 0.375 | 0.974          | 0.952  |
| FG9       | 0.26     | 0.36  | 0.966          | 0.966 | 0.278   | 0.369 | 0.964          | 0.963  |
| GRNN1     | 0.519    | 0.68  | 0.878          | 0.877 | 0.457   | 0.607 | 0.904          | 0.902  |
| GRNN2     | 0.556    | 0.733 | 0.859          | 0.857 | 0.581   | 0.736 | 0.86           | 0.856  |
| GRNN3     | 0.926    | 1.127 | 0.664          | 0.662 | 1.02    | 1.197 | 0.705          | 0.619  |
| GRNN4     | 1.564    | 1.926 | 0.023          | 0.022 | 1.578   | 1.930 | 0.006          | 0.005  |
| GRNN5     | 1.526    | 1.882 | 0.09           | 0.059 | 1.621   | 1.971 | 0.011          | -0.033 |
| GRNN6     | 0.322    | 0.438 | 0.949          | 0.949 | 0.314   | 0.409 | 0.957          | 0.955  |
| GRNN7     | 0.238    | 0.327 | 0.972          | 0.972 | 0.295   | 0.404 | 0.961          | 0.957  |
| GRNN8     | 0.119    | 0.17  | 0.992          | 0.992 | 0.308   | 0.400 | 0.960          | 0.956  |
| GRNN9     | 0.047    | 0.084 | 0.998          | 0.998 | 0.367   | 0.524 | 0.929          | 0.927  |
| LSSVM1    | 0.517    | 0.679 | 0.878          | 0.878 | 0.442   | 0.596 | 0.906          | 0.905  |
| LSSVM2    | 0.55     | 0.713 | 0.865          | 0.865 | 0.546   | 0.695 | 0.873          | 0.872  |
| LSSVM3    | 0.996    | 1.214 | 0.638          | 0.608 | 1.074   | 1.267 | 0.678          | 0.573  |
| LSSVM4    | 1.554    | 1.918 | 0.022          | 0.022 | 1.568   | 1.937 | 0.005          | 0.002  |
| LSSVM5    | 1.527    | 1.865 | 0.078          | 0.075 | 1.654   | 1.996 | 0.016          | -0.06  |
| LSSVM6    | 0.367    | 0.504 | 0.933          | 0.932 | 0.325   | 0.437 | 0.951          | 0.949  |
| LSSVM7    | 0.364    | 0.496 | 0.937          | 0.935 | 0.328   | 0.427 | 0.961          | 0.951  |
| LSSVM8    | 0.385    | 0.538 | 0.935          | 0.923 | 0.379   | 0.493 | 0.953          | 0.935  |
| LSSVM9    | 0.278    | 0.382 | 0.963          | 0.961 | 0.296   | 0.397 | 0.961          | 0.958  |
| MARS1     | 0.52     | 0.69  | 0.874          | 0.874 | 0.443   | 0.601 | 0.904          | 0.904  |
| MARS2     | 0.534    | 0.686 | 0.875          | 0.875 | 0.524   | 0.673 | 0.881          | 0.879  |
| MARS3     | 0.915    | 1.132 | 0.660          | 0.66  | 1.032   | 1.226 | 0.675          | 0.60   |
| MARS4     | 1.571    | 1.94  | 0.0            | 0     | 1.591   | 1.939 | 0.00           | 0      |
| MARS5     | 1.486    | 1.833 | 0.107          | 0.107 | 1.712   | 2.069 | 0.024          | -0.139 |
| MARS6     | 0.339    | 0.449 | 0.946          | 0.946 | 0.273   | 0.362 | 0.966          | 0.965  |
| MARS7     | 0.335    | 0.437 | 0.949          | 0.949 | 0.282   | 0.358 | 0.966          | 0.966  |
| MARS8     | 0.287    | 0.374 | 0.963          | 0.963 | 0.314   | 0.386 | 0.976          | 0.96   |

|              |              |              |              |              |              |              |              |              |
|--------------|--------------|--------------|--------------|--------------|--------------|--------------|--------------|--------------|
| <b>MARS9</b> | <b>0.27</b>  | <b>0.358</b> | <b>0.966</b> | <b>0.966</b> | <b>0.276</b> | <b>0.361</b> | <b>0.967</b> | <b>0.965</b> |
| MLP1         | 0.529        | 0.691        | 0.873        | 0.873        | 0.449        | 0.598        | 0.906        | 0.905        |
| MLP2         | 0.523        | 0.68         | 0.877        | 0.877        | 0.523        | 0.674        | 0.881        | 0.879        |
| MLP3         | 0.908        | 1.124        | 0.664        | 0.664        | 0.992        | 1.181        | 0.698        | 0.626        |
| <b>MLP4</b>  | <b>1.554</b> | <b>1.919</b> | <b>0.022</b> | <b>0.022</b> | <b>1.564</b> | <b>1.931</b> | <b>0.01</b>  | <b>0.008</b> |
| <b>MLP5</b>  | <b>1.541</b> | <b>1.883</b> | <b>0.058</b> | <b>0.058</b> | <b>1.578</b> | <b>1.929</b> | <b>0.056</b> | <b>0.01</b>  |
| MLP6         | 0.334        | 0.65         | 0.894        | 0.894        | 0.266        | 0.355        | 0.966        | 0.962        |
| MLP7         | 0.333        | 0.446        | 0.947        | 0.947        | 0.279        | 0.348        | 0.968        | 0.966        |
| MLP8         | 0.247        | 0.326        | 0.972        | 0.972        | 0.318        | 0.405        | 0.978        | 0.952        |
| <b>MLP9</b>  | <b>0.244</b> | <b>0.319</b> | <b>0.973</b> | <b>0.973</b> | <b>0.263</b> | <b>0.340</b> | <b>0.977</b> | <b>0.969</b> |
| SS           | 0.35         | 0.487        | 0.938        | 0.938        | 0.291        | 0.388        | 0.96         | 0.96         |
| MLR          | 0.32         | 0.427        | 0.952        | 0.952        | 0.395        | 0.486        | 0.942        | 0.94         |

Table 11. Comparisons of different models for predicting  $Ep$  at HK station.

| HK               | Training     |              |                |              | Testing      |              |                |               |
|------------------|--------------|--------------|----------------|--------------|--------------|--------------|----------------|---------------|
|                  | MAE          | RMSE         | R <sup>2</sup> | E            | MAE          | RMSE         | R <sup>2</sup> | E             |
| ANFIS-GP1        | 0.528        | 0.688        | 0.814          | 0.814        | 0.669        | 0.800        | 0.854          | 0.727         |
| ANFIS-GP2        | 0.741        | 0.964        | 0.634          | 0.634        | 0.802        | 0.970        | 0.742          | 0.599         |
| ANFIS-GP3        | 0.619        | 0.798        | 0.749          | 0.749        | 0.482        | 0.610        | 0.851          | 0.841         |
| <b>ANFIS-GP4</b> | <b>1.23</b>  | <b>1.451</b> | <b>0.171</b>   | <b>0.171</b> | <b>1.200</b> | <b>1.490</b> | <b>0.268</b>   | <b>0.054</b>  |
| <b>ANFIS-GP5</b> | <b>1.305</b> | <b>1.594</b> | <b>0.01</b>    | <b>0.01</b>  | <b>1.333</b> | <b>1.585</b> | <b>0.030</b>   | <b>-0.072</b> |
| ANFIS-GP6        | 0.488        | 0.646        | 0.836          | 0.836        | 0.660        | 0.796        | 0.861          | 0.73          |
| ANFIS-GP7        | 0.46         | 0.597        | 0.86           | 0.86         | 0.494        | 0.609        | 0.891          | 0.842         |
| ANFIS-GP8        | 0.388        | 0.501        | 0.901          | 0.901        | 0.809        | 0.930        | 0.919          | 0.631         |
| <b>ANFIS-GP9</b> | <b>0.286</b> | <b>0.379</b> | <b>0.943</b>   | <b>0.943</b> | <b>0.428</b> | <b>0.555</b> | <b>0.925</b>   | <b>0.869</b>  |
| FG1              | 0.506        | 0.661        | 0.828          | 0.828        | 0.662        | 0.792        | 0.858          | 0.732         |
| FG2              | 0.716        | 0.914        | 0.671          | 0.671        | 0.793        | 0.940        | 0.784          | 0.623         |
| FG3              | 0.612        | 0.768        | 0.768          | 0.768        | 0.503        | 0.630        | 0.850          | 0.831         |
| <b>FG4</b>       | <b>1.103</b> | <b>1.333</b> | <b>0.30</b>    | <b>0.300</b> | <b>1.169</b> | <b>1.480</b> | <b>0.306</b>   | <b>0.077</b>  |
| <b>FG5</b>       | <b>1.234</b> | <b>1.531</b> | <b>0.08</b>    | <b>0.080</b> | <b>1.430</b> | <b>1.739</b> | <b>0.030</b>   | <b>-0.251</b> |
| FG6              | 0.471        | 0.626        | 0.846          | 0.846        | 0.659        | 0.786        | 0.875          | 0.738         |
| FG7              | 0.451        | 0.591        | 0.863          | 0.863        | 0.485        | 0.596        | 0.895          | 0.843         |
| FG8              | 0.39         | 0.496        | 0.903          | 0.903        | 0.718        | 0.849        | 0.920          | 0.688         |
| <b>FG9</b>       | <b>0.311</b> | <b>0.397</b> | <b>0.938</b>   | <b>0.938</b> | <b>0.414</b> | <b>0.552</b> | <b>0.932</b>   | <b>0.870</b>  |
| GRNN1            | 0.505        | 0.666        | 0.829          | 0.829        | 0.673        | 0.810        | 0.854          | 0.719         |
| GRNN2            | 0.699        | 0.902        | 0.681          | 0.680        | 0.786        | 0.929        | 0.776          | 0.63          |
| GRNN3            | 0.6          | 0.759        | 0.775          | 0.773        | 0.511        | 0.642        | 0.845          | 0.825         |
| <b>GRNN4</b>     | <b>1.11</b>  | <b>1.335</b> | <b>0.311</b>   | <b>0.299</b> | <b>1.178</b> | <b>1.472</b> | <b>0.316</b>   | <b>0.077</b>  |
| <b>GRNN5</b>     | <b>1.295</b> | <b>1.581</b> | <b>0.025</b>   | <b>0.016</b> | <b>1.342</b> | <b>1.600</b> | <b>0.008</b>   | <b>-0.09</b>  |
| GRNN6            | 0.452        | 0.605        | 0.859          | 0.859        | 0.65         | 0.771        | 0.879          | 0.734         |
| GRNN7            | 0.405        | 0.535        | 0.889          | 0.889        | 0.484        | 0.589        | 0.892          | 0.842         |
| GRNN8            | 0.408        | 0.538        | 0.894          | 0.894        | 0.539        | 0.651        | 0.916          | 0.853         |
| <b>GRNN9</b>     | <b>0.241</b> | <b>0.342</b> | <b>0.956</b>   | <b>0.956</b> | <b>0.415</b> | <b>0.512</b> | <b>0.917</b>   | <b>0.881</b>  |
| LSSVM1           | 0.502        | 0.658        | 0.829          | 0.829        | 0.671        | 0.802        | 0.858          | 0.726         |
| LSSVM2           | 0.70         | 0.895        | 0.685          | 0.685        | 0.822        | 0.971        | 0.793          | 0.598         |

|        |       |       |       |       |       |       |       |        |
|--------|-------|-------|-------|-------|-------|-------|-------|--------|
| LSSVM3 | 0.649 | 0.828 | 0.766 | 0.73  | 0.578 | 0.714 | 0.852 | 0.782  |
| LSSVM4 | 1.10  | 1.333 | 0.301 | 0.301 | 1.151 | 1.469 | 0.311 | 0.08   |
| LSSVM5 | 1.296 | 1.588 | 0.009 | 0.007 | 1.349 | 1.611 | 0.007 | -0.107 |
| LSSVM6 | 0.481 | 0.64  | 0.841 | 0.839 | 0.658 | 0.787 | 0.868 | 0.736  |
| LSSVM7 | 0.463 | 0.609 | 0.856 | 0.854 | 0.491 | 0.603 | 0.891 | 0.845  |
| LSSVM8 | 0.441 | 0.571 | 0.880 | 0.872 | 0.552 | 0.664 | 0.917 | 0.812  |
| LSSVM9 | 0.326 | 0.425 | 0.930 | 0.929 | 0.398 | 0.501 | 0.925 | 0.893  |
| MARS1  | 0.506 | 0.661 | 0.828 | 0.828 | 0.662 | 0.791 | 0.860 | 0.733  |
| MARS2  | 0.664 | 0.862 | 0.708 | 0.708 | 0.858 | 1.023 | 0.766 | 0.554  |
| MARS3  | 0.603 | 0.758 | 0.774 | 0.774 | 0.5   | 0.638 | 0.842 | 0.826  |
| MARS4  | 1.084 | 1.315 | 0.319 | 0.319 | 1.185 | 1.500 | 0.243 | 0.041  |
| MARS5  | 1.266 | 1.56  | 0.043 | 0.043 | 1.364 | 1.634 | 0.001 | -0.138 |
| MARS6  | 0.438 | 0.581 | 0.867 | 0.867 | 0.733 | 0.899 | 0.869 | 0.655  |
| MARS7  | 0.426 | 0.547 | 0.882 | 0.882 | 0.536 | 0.691 | 0.891 | 0.797  |
| MARS8  | 0.407 | 0.517 | 0.895 | 0.895 | 0.682 | 0.807 | 0.917 | 0.722  |
| MARS9  | 0.322 | 0.414 | 0.932 | 0.932 | 0.397 | 0.515 | 0.927 | 0.887  |
| MLP1   | 0.512 | 0.671 | 0.823 | 0.823 | 0.657 | 0.793 | 0.855 | 0.732  |
| MLP2   | 0.686 | 0.878 | 0.697 | 0.697 | 0.822 | 0.979 | 0.792 | 0.591  |
| MLP3   | 0.707 | 0.903 | 0.679 | 0.679 | 0.821 | 0.973 | 0.79  | 0.626  |
| MLP4   | 1.073 | 1.309 | 0.325 | 0.325 | 1.137 | 1.459 | 0.293 | 0.092  |
| MLP5   | 1.306 | 1.591 | 0.005 | 0.005 | 1.329 | 1.576 | 0.028 | -0.058 |
| MLP6   | 0.47  | 0.623 | 0.847 | 0.847 | 0.657 | 0.779 | 0.878 | 0.741  |
| MLP7   | 0.421 | 0.542 | 0.884 | 0.884 | 0.485 | 0.594 | 0.897 | 0.847  |
| MLP8   | 0.431 | 0.554 | 0.88  | 0.879 | 0.671 | 0.786 | 0.916 | 0.736  |
| MLP9   | 0.34  | 0.444 | 0.923 | 0.923 | 0.386 | 0.491 | 0.930 | 0.897  |
| SS     | 0.523 | 0.683 | 0.827 | 0.827 | 0.64  | 0.773 | 0.823 | 0.822  |
| MLR    | 0.328 | 0.431 | 0.927 | 0.927 | 0.396 | 0.505 | 0.927 | 0.925  |

---

Table 12. Accuracy ranks\* of the soft computing models in estimating  $Ep$ .

| Stations     | ANFIS-GP  | FG        | GRNN      | LSSV      | MARS      | MLP       | MLR       |
|--------------|-----------|-----------|-----------|-----------|-----------|-----------|-----------|
| HEB          | 2         | 3         | 4         | 6         | 5         | 1         | 7         |
| ALT          | 3         | 4         | 6         | 2         | 5         | 1         | 7         |
| MQ           | 3         | 2         | 4         | 7         | 5         | 1         | 6         |
| BJ           | 4         | 5         | 3         | 2         | 6         | 1         | 7         |
| LSA          | 6         | 5         | 1         | 3         | 4         | 2         | 7         |
| CQ           | 6         | 3         | 2         | 4         | 5         | 1         | 7         |
| HZ           | 6         | 4         | 2         | 5         | 3         | 1         | 7         |
| HK           | 6         | 7         | 3         | 5         | 4         | 1         | 2         |
| ALL          | 4         | 5         | 2         | 3         | 6         | 1         | 7         |
| <b>Total</b> | <b>40</b> | <b>38</b> | <b>27</b> | <b>37</b> | <b>43</b> | <b>10</b> | <b>57</b> |

\* Accuracy ranks were determined according to the RMSE, MAE, E and  $R^2$  criteria. For the HEB, for example, MLP has the highest accuracy (1<sup>st</sup> model) while the MLR has the lowest accuracy (7<sup>th</sup> model).

Table 13. Comparisons of different models for predicting  $Ep$  at all stations.

|           | Training |       |                |       | Testing |       |                |        |
|-----------|----------|-------|----------------|-------|---------|-------|----------------|--------|
|           | MAE      | RMSE  | R <sup>2</sup> | $E$   | MAE     | RMSE  | R <sup>2</sup> | $E$    |
| ANFIS-GP1 | 1.204    | 1.681 | 0.739          | 0.739 | 1.022   | 1.378 | 0.804          | 0.803  |
| ANFIS-GP2 | 1.906    | 2.522 | 0.412          | 0.412 | 1.768   | 2.345 | 0.437          | 0.431  |
| ANFIS-GP3 | 1.913    | 2.377 | 0.478          | 0.478 | 1.877   | 2.262 | 0.475          | 0.471  |
| ANFIS-GP4 | 1.23     | 1.451 | 0.171          | 0.171 | 1.20    | 1.490 | 0.268          | 0.054  |
| ANFIS-GP5 | 1.305    | 1.594 | 0.001          | 0.001 | 1.333   | 1.585 | 0.029          | -0.072 |
| ANFIS-GP6 | 0.994    | 1.446 | 0.807          | 0.807 | 0.88    | 1.228 | 0.847          | 0.844  |
| ANFIS-GP7 | 0.917    | 1.341 | 0.834          | 0.834 | 0.782   | 1.113 | 0.872          | 0.872  |
| ANFIS-GP8 | 0.606    | 0.846 | 0.934          | 0.934 | 0.601   | 0.833 | 0.933          | 0.928  |
| ANFIS-GP9 | 0.517    | 0.738 | 0.95           | 0.95  | 0.486   | 0.666 | 0.957          | 0.957  |
| FG1       | 1.208    | 1.676 | 0.74           | 0.74  | 1.028   | 1.377 | 0.805          | 0.804  |
| FG2       | 1.883    | 2.511 | 0.417          | 0.417 | 1.741   | 2.332 | 0.443          | 0.438  |
| FG3       | 1.8      | 2.221 | 0.544          | 0.544 | 1.812   | 2.148 | 0.524          | 0.521  |
| FG4       | 1.106    | 1.336 | 0.298          | 0.298 | 1.151   | 1.469 | 0.318          | 0.075  |
| FG5       | 1.288    | 1.567 | 0.034          | 0.034 | 1.326   | 1.565 | 0.009          | -0.044 |
| FG6       | 0.936    | 1.378 | 0.824          | 0.824 | 0.821   | 1.154 | 0.865          | 0.862  |
| FG7       | 0.883    | 1.294 | 0.845          | 0.845 | 0.753   | 1.072 | 0.882          | 0.880  |
| FG8       | 0.589    | 0.834 | 0.936          | 0.936 | 0.607   | 0.842 | 0.931          | 0.929  |
| FG9       | 0.518    | 0.744 | 0.949          | 0.949 | 0.495   | 0.678 | 0.956          | 0.954  |
| GRNN1     | 1.193    | 1.669 | 0.743          | 0.743 | 1.013   | 1.373 | 0.806          | 0.805  |
| GRNN2     | 1.859    | 2.49  | 0.427          | 0.427 | 1.716   | 2.311 | 0.453          | 0.448  |
| GRNN3     | 1.772    | 2.216 | 0.549          | 0.546 | 1.773   | 2.127 | 0.532          | 0.532  |
| GRNN4     | 1.11     | 1.335 | 0.311          | 0.299 | 1.178   | 1.472 | 0.316          | 0.077  |
| GRNN5     | 1.295    | 1.581 | 0.025          | 0.016 | 1.342   | 1.600 | 0.02           | -0.091 |
| GRNN6     | 0.819    | 1.234 | 0.86           | 0.859 | 0.733   | 1.075 | 0.884          | 0.880  |
| GRNN7     | 0.724    | 1.114 | 0.886          | 0.885 | 0.642   | 0.963 | 0.905          | 0.904  |
| GRNN8     | 0.458    | 0.674 | 0.958          | 0.958 | 0.489   | 0.723 | 0.947          | 0.946  |
| GRNN9     | 0.265    | 0.425 | 0.984          | 0.983 | 0.364   | 0.573 | 0.967          | 0.966  |
| LSSVM1    | 1.198    | 1.667 | 0.743          | 0.743 | 1.017   | 1.371 | 0.807          | 0.806  |
| LSSVM2    | 1.85     | 2.495 | 0.425          | 0.425 | 1.703   | 2.312 | 0.453          | 0.447  |
| LSSVM3    | 1.854    | 2.314 | 0.506          | 0.505 | 1.858   | 2.215 | 0.493          | 0.492  |
| LSSVM4    | 1.10     | 1.333 | 0.301          | 0.301 | 1.151   | 1.469 | 0.311          | 0.08   |
| LSSVM5    | 1.296    | 1.588 | 0.009          | 0.007 | 1.349   | 1.611 | 0.007          | -0.107 |
| LSSVM6    | 0.935    | 1.386 | 0.823          | 0.822 | 0.806   | 1.149 | 0.866          | 0.864  |
| LSSVM7    | 0.933    | 1.369 | 0.827          | 0.827 | 0.8     | 1.134 | 0.867          | 0.867  |
| LSSVM8    | 0.824    | 1.148 | 0.879          | 0.878 | 0.774   | 1.023 | 0.893          | 0.892  |
| LSSVM9    | 0.494    | 0.719 | 0.952          | 0.952 | 0.476   | 0.657 | 0.958          | 0.955  |
| MARS1     | 1.198    | 1.666 | 0.744          | 0.744 | 1.021   | 1.373 | 0.806          | 0.805  |
| MARS2     | 1.793    | 2.428 | 0.455          | 0.455 | 1.676   | 2.268 | 0.476          | 0.468  |
| MARS3     | 1.772    | 2.206 | 0.55           | 0.55  | 1.77    | 2.125 | 0.534          | 0.533  |
| MARS4     | 1.084    | 1.315 | 0.319          | 0.319 | 1.185   | 1.500 | 0.243          | 0.040  |
| MARS5     | 1.268    | 1.561 | 0.04           | 0.04  | 1.386   | 1.677 | 0.012          | -0.199 |



|              |              |              |              |              |              |              |              |               |
|--------------|--------------|--------------|--------------|--------------|--------------|--------------|--------------|---------------|
| MARS6        | 1.025        | 1.439        | 0.808        | <b>0.808</b> | 0.924        | 1.232        | 0.846        | <b>0.843</b>  |
| MARS7        | 0.925        | 1.324        | 0.838        | <b>0.838</b> | 0.804        | 1.113        | 0.873        | <b>0.872</b>  |
| MARS8        | 0.782        | 1.03         | 0.902        | <b>0.902</b> | 0.754        | 0.956        | 0.910        | <b>0.906</b>  |
| <b>MARS9</b> | <b>0.692</b> | <b>0.933</b> | <b>0.920</b> | <b>0.920</b> | <b>0.654</b> | <b>0.829</b> | <b>0.932</b> | <b>0.929</b>  |
| MLP1         | 1.196        | 1.663        | 0.744        | <b>0.744</b> | 1.020        | 1.373        | 0.806        | <b>0.805</b>  |
| MLP2         | 1.835        | 2.485        | 0.429        | <b>0.429</b> | 1.689        | 2.304        | 0.457        | <b>0.451</b>  |
| MLP3         | 1.842        | 2.491        | 0.426        | <b>0.426</b> | 1.695        | 2.302        | 0.458        | <b>0.452</b>  |
| <b>MLP4</b>  | <b>1.073</b> | <b>1.309</b> | <b>0.325</b> | <b>0.325</b> | <b>1.137</b> | <b>1.459</b> | <b>0.293</b> | <b>0.090</b>  |
| <b>MLP5</b>  | <b>1.306</b> | <b>1.591</b> | <b>0.005</b> | <b>0.005</b> | <b>1.329</b> | <b>1.576</b> | <b>0.03</b>  | <b>-0.058</b> |
| MLP6         | 0.836        | 1.256        | 0.854        | <b>0.854</b> | 0.740        | 1.086        | 0.882        | <b>0.878</b>  |
| MLP7         | 0.774        | 1.181        | 0.871        | <b>0.871</b> | 0.649        | 0.980        | 0.902        | <b>0.901</b>  |
| MLP8         | 0.529        | 0.758        | 0.947        | <b>0.947</b> | 0.531        | 0.770        | 0.943        | <b>0.939</b>  |
| <b>MLP9</b>  | <b>0.279</b> | <b>0.398</b> | <b>0.985</b> | <b>0.985</b> | <b>0.314</b> | <b>0.405</b> | <b>0.988</b> | <b>0.981</b>  |
| SS           | 1.107        | 1.544        | 0.785        | <b>0.785</b> | 1.007        | 1.336        | 0.823        | <b>0.822</b>  |
| MLR          | 0.905        | 1.235        | 0.859        | <b>0.859</b> | 0.860        | 1.091        | 0.880        | <b>0.880</b>  |

Table 14. Evaluation of the optimal models by training with testing dataset and testing with training dataset

|             | Training     |              |                |              | Testing      |                |              |              |
|-------------|--------------|--------------|----------------|--------------|--------------|----------------|--------------|--------------|
|             | MAE          | RMSE         | R <sup>2</sup> | EMA          | RMSE         | R <sup>2</sup> | E            |              |
| ANFIS-GP9   | 0.447        | 0.631        | 0.959          | 0.959        | 0.526        | 0.792          | 0.945        | 0.942        |
| FG9         | 0.476        | 0.686        | 0.951          | 0.951        | 0.591        | 0.864          | 0.934        | 0.931        |
| GRNN9       | 0.230        | 0.331        | 0.989          | 0.989        | 0.493        | 0.820          | 0.941        | 0.927        |
| LSSVM9      | 0.703        | 0.962        | 0.907          | 0.907        | 0.784        | 1.170          | 0.882        | 0.826        |
| MARS9       | 0.600        | 0.783        | 0.937          | 0.937        | 0.691        | 0.968          | 0.916        | 0.913        |
| <b>MLP9</b> | <b>0.383</b> | <b>0.537</b> | <b>0.970</b>   | <b>0.970</b> | <b>0.481</b> | <b>0.735</b>   | <b>0.953</b> | <b>0.950</b> |

Table 15. The MLP model performances tested at different stations with full weather inputs

|     | Training |       |                |       | Testing |       |                |       |
|-----|----------|-------|----------------|-------|---------|-------|----------------|-------|
|     | MAE      | RMSE  | R <sup>2</sup> | E     | MAE     | RMSE  | R <sup>2</sup> | E     |
| HEB | 0.150    | 0.197 | 0.996          | 0.996 | 0.498   | 0.687 | 0.970          | 0.956 |
| ALT | 0.193    | 0.255 | 0.994          | 0.994 | 0.524   | 0.831 | 0.980          | 0.957 |
| MQ  | 0.446    | 0.542 | 0.984          | 0.983 | 0.693   | 0.908 | 0.974          | 0.960 |
| BJ  | 0.187    | 0.241 | 0.992          | 0.992 | 0.468   | 0.813 | 0.930          | 0.921 |
| LSA | 0.270    | 0.342 | 0.976          | 0.976 | 0.636   | 0.788 | 0.880          | 0.876 |
| CQ  | 0.114    | 0.159 | 0.992          | 0.992 | 0.317   | 0.740 | 0.865          | 0.862 |
| HZ  | 0.208    | 0.271 | 0.981          | 0.981 | 0.403   | 0.535 | 0.937          | 0.924 |
| HK  | 0.317    | 0.393 | 0.934          | 0.934 | 0.414   | 0.548 | 0.922          | 0.882 |
